# Supplementary material
Source: Springer Nature journal article supplement (https://www.springermedizin.de/resource/supplementary/12883_2011_564_MOESM3_ESM.pdf/9455404)

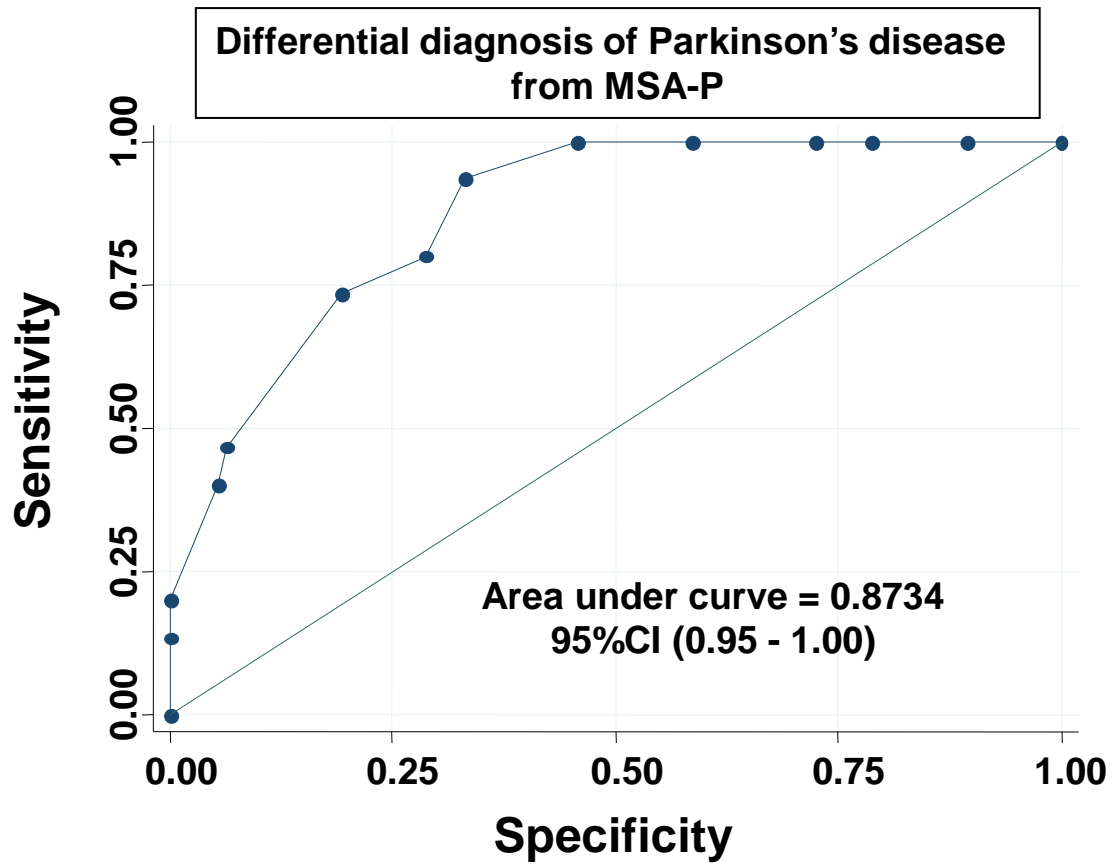

Figure 2b Suzuki et al

Supplement: MOESM3 [file 9455404]
